# Supplementary material
Source: publisher figshare collection journal article supplement (https://sage.figshare.com/ndownloader/files/38691840)
Supplement: Supplementary file 1 [file 38691840]

> library(foreign)
> library(tidyLPA)
You can use the function citation('tidyLPA') to create a citation for the use of {tidyLPA}.
Mplus is not installed. Use only package = 'mclust' when calling estimate_profiles().
> data2=read.csv('/Users/Desktop/RSS.csv')
> m2=estimate_profiles(df=data2,n_profiles = 2,variances = 'equal',covariances = 'zero',package = 'mclust')
> get_fit(m2)
# A tibble: 1 x 18
  Model Classes LogLik    AIC    AWE    BIC   CAIC    CLC    KIC  SABIC     ICL
  <dbl>   <dbl>  <dbl>  <dbl>  <dbl>  <dbl>  <dbl>  <dbl>  <dbl>  <dbl>   <dbl>
1     1       2 -9337. 18707. 18950. 18789. 18805. 18676. 18726. 18738. -18854.
# â€?with 7 more variables: Entropy <dbl>, prob_min <dbl>, prob_max <dbl>,
#   n_min <dbl>, n_max <dbl>, BLRT_val <dbl>, BLRT_p <dbl>
> m3=estimate_profiles(df=data2,n_profiles = 3,variances = 'equal',covariances = 'zero',package = 'mclust')
> get_fit(m3)
# A tibble: 1 x 18
  Model Classes LogLik    AIC    AWE    BIC   CAIC    CLC    KIC  SABIC     ICL
  <dbl>   <dbl>  <dbl>  <dbl>  <dbl>  <dbl>  <dbl>  <dbl>  <dbl>  <dbl>   <dbl>
1     1       3 -8938. 17919. 18254. 18033. 18055. 17877. 17944. 17963. -18068.
# â€?with 7 more variables: Entropy <dbl>, prob_min <dbl>, prob_max <dbl>,
#   n_min <dbl>, n_max <dbl>, BLRT_val <dbl>, BLRT_p <dbl>
> m1=estimate_profiles(df=data2,n_profiles = 1,variances = 'equal',covariances = 'zero',package = 'mclust')
> get_fit(m1)
# A tibble: 1 x 18
  Model Classes  LogLik    AIC    AWE    BIC   CAIC    CLC    KIC  SABIC     ICL
  <dbl>   <dbl>   <dbl>  <dbl>  <dbl>  <dbl>  <dbl>  <dbl>  <dbl>  <dbl>   <dbl>
1     1       1 -10118. 20256. 20407. 20307. 20317. 20238. 20269. 20275. -20307.
# â€?with 7 more variables: Entropy <dbl>, prob_min <dbl>, prob_max <dbl>,
#   n_min <dbl>, n_max <dbl>, BLRT_val <dbl>, BLRT_p <dbl>
> m4=estimate_profiles(df=data2,n_profiles = 4,variances = 'equal',covariances = 'zero',package = 'mclust')
> get_fit(m4)
# A tibble: 1 x 18
  Model Classes LogLik    AIC    AWE    BIC   CAIC    CLC    KIC  SABIC     ICL
  <dbl>   <dbl>  <dbl>  <dbl>  <dbl>  <dbl>  <dbl>  <dbl>  <dbl>  <dbl>   <dbl>
1     1       4 -8734. 17524. 17951. 17668. 17696. 17469. 17555. 17579. -17851.
# â€?with 7 more variables: Entropy <dbl>, prob_min <dbl>, prob_max <dbl>,
#   n_min <dbl>, n_max <dbl>, BLRT_val <dbl>, BLRT_p <dbl>
> plot_profiles(m2,variables = NULL,ci=NULL,sd=FALSE,rawdata = FALSE,add_line = TRUE)
> m2
tidyLPA analysis using mclust: 

 Model Classes AIC      BIC      Entropy prob_min prob_max n_min n_max BLRT_p
 1     2       18706.56 18789.11 0.93    0.93     0.99     0.13  0.87  0.01  
> get_estimates(m2)
# A tibble: 20 x 8
   Category  Parameter     Estimate     se         p Class Model Classes
   <chr>     <chr>            <dbl>  <dbl>     <dbl> <int> <dbl>   <dbl>
 1 Means     childcare        2.35  0.294  1.64e- 15     1     1       2
 2 Means     ecosupport       2.24  0.283  2.49e- 15     1     1       2
 3 Means     foodsupport      3.11  0.373  6.69e- 17     1     1       2
 4 Means     healthsupport    2.47  0.549  7.09e-  6     1     1       2
 5 Means     mentalsupport    3.55  0.479  1.18e- 13     1     1       2
 6 Variances childcare        0.858 0.0748 1.69e- 30     1     1       2
 7 Variances ecosupport       0.803 0.0799 8.60e- 24     1     1       2
 8 Variances foodsupport      0.910 0.0852 1.20e- 26     1     1       2
 9 Variances healthsupport    0.735 0.0950 9.51e- 15     1     1       2
10 Variances mentalsupport    1.56  0.0964 6.63e- 59     1     1       2
11 Means     childcare        1.06  0.0406 3.11e-150     2     1       2
12 Means     ecosupport       0.706 0.0423 1.29e- 62     2     1       2
13 Means     foodsupport      0.814 0.0611 1.54e- 40     2     1       2
14 Means     healthsupport    0.298 0.0444 1.92e- 11     2     1       2
15 Means     mentalsupport    1.08  0.0619 7.71e- 68     2     1       2
16 Variances childcare        0.858 0.0748 1.69e- 30     2     1       2
17 Variances ecosupport       0.803 0.0799 8.60e- 24     2     1       2
18 Variances foodsupport      0.910 0.0852 1.20e- 26     2     1       2
19 Variances healthsupport    0.735 0.0950 9.51e- 15     2     1       2
20 Variances mentalsupport    1.56  0.0964 6.63e- 59     2     1       2
> data1=read.csv('/Users/Desktop/PSS.csv')
> estimate_profiles(df=data1,n_profiles = 1:5,variances = 'equal',covariances = 'zero',package = 'mclust')
tidyLPA analysis using mclust: 

 Model Classes AIC      BIC      Entropy prob_min prob_max n_min n_max BLRT_p
 1     1       44920.68 45013.55 1.00    1.00     1.00     1.00  1.00        
 1     2       40937.45 41081.91 0.94    0.98     0.98     0.39  0.61  0.01  
 1     3       39656.69 39852.74 0.93    0.96     1.00     0.29  0.38  0.01  
 1     4       37386.66 37634.31 0.96    0.97     0.98     0.14  0.31  0.01  
 1     5       37354.21 37653.45 0.93    0.91     1.00     0.06  0.39  0.01  
> m4=estimate_profiles(df=data1,n_profiles = 4,variances = 'equal',covariances = 'zero',package = 'mclust')
> get_estimates(m4)
# A tibble: 72 x 8
   Category  Parameter  Estimate     se        p Class Model Classes
   <chr>     <chr>         <dbl>  <dbl>    <dbl> <int> <dbl>   <dbl>
 1 Means     couple       2.52   0.180  1.42e-44     1     1       4
 2 Means     family       2.65   0.187  3.38e-45     1     1       4
 3 Means     relative     0.603  0.140  1.69e- 5     1     1       4
 4 Means     friend       0.669  0.200  8.32e- 4     1     1       4
 5 Means     neighbor     0.283  0.0625 5.72e- 6     1     1       4
 6 Means     netfriend    0.137  0.0377 2.63e- 4     1     1       4
 7 Means     volunteer    0.411  0.0858 1.70e- 6     1     1       4
 8 Means     charity      0.0931 0.0243 1.25e- 4     1     1       4
 9 Means     government   0.845  0.123  6.87e-12     1     1       4
10 Variances couple       1.47   0.0916 1.49e-57     1     1       4
# â€?with 62 more rows
> m4es=get_estimates(m4)
> cat(m4es$Estimate,fill = FALSE, labels = NULL,append = FALSE)
2.515743 2.645008 0.6025037 0.6685759 0.2834155 0.1373973 0.4105999 0.09312339 0.8450908 1.465251 1.099565 1.206181 0.851593 1.741379 1.580095 1.743374 0.149196 2.044585 4.012286 4.05701 3.644327 3.657189 3.244164 2.811951 3.286417 2.992715 3.427463 1.465251 1.099565 1.206181 0.851593 1.741379 1.580095 1.743374 0.149196 2.044585 4.629557 4.716356 4.604739 4.623599 4.377231 4.047438 4.592815 4.621813 4.640422 1.465251 1.099565 1.206181 0.851593 1.741379 1.580095 1.743374 0.149196 2.044585 4.401345 4.602242 3.90784 4.16494 2.46275 0.84129 1.595649 0.07126876 2.306393 1.465251 1.099565 1.206181 0.851593 1.741379 1.580095 1.743374 0.149196 2.044585
> plot_profiles(m4,variables = NULL,ci=NULL,sd=FALSE,rawdata = FALSE,add_line = TRUE)
